# Supplementary material for: Harnessing X‐Ray Energy‐Dependent Attenuation of Bismuth‐Based Nanoprobes for Accurate Diagnosis of Liver Fibrosis
Source: PubMed Central journal article supplement (PMC8188217; doi:10.1002/advs.202002548), 2021-03-16
Supplement: ADVS-8-2002548-s001.pdf [file ADVS-8-2002548-s001.pdf]

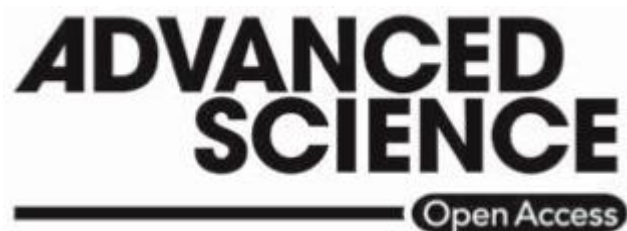

## Supporting Information

for *Adv. Sci.*, DOI: 10.1002/advs.202002548

### Harnessing X-ray Energy Dependent Attenuation of Bismuth-Based Nanoprobes for Accurate Diagnosis of Liver Fibrosis

*Shiman Wu*<sup>1</sup>, *Xianfu Meng*<sup>2,3</sup>, *Xingwu Jiang*<sup>2</sup>, *Yelin Wu*<sup>3</sup>, *Shaojie Zhai*<sup>4</sup>, *Xiaoshuang Wang*<sup>1</sup>, *Yanyan Liu*<sup>2</sup>, *Jiawen Zhang*<sup>1</sup>, *Xinxin Zhao*<sup>5</sup>, *Yan Zhou*<sup>5\*</sup>, *Wenbo Bu*<sup>2,4\*</sup>, *Zhenwei Yao*<sup>1\*</sup>

Supporting Information

**Harnessing X-ray Energy Dependent Attenuation of Bismuth-Based Nanoprobes  
for Accurate Diagnosis of Liver Fibrosis**

*Shiman Wu<sup>1</sup>, Xianfu Meng<sup>2,3</sup>, Xingwu Jiang<sup>2</sup>, Yelin Wu<sup>3</sup>, Shaojie Zhai<sup>4</sup>, Xiaoshuang Wang<sup>1</sup>, Yanyan Liu<sup>2</sup>, Jiawen Zhang<sup>1</sup>, Xinxin Zhao<sup>5</sup>, Yan Zhou<sup>5\*</sup>, Wenbo Bu<sup>2,4\*</sup>, Zhenwei Yao<sup>1\*</sup>*

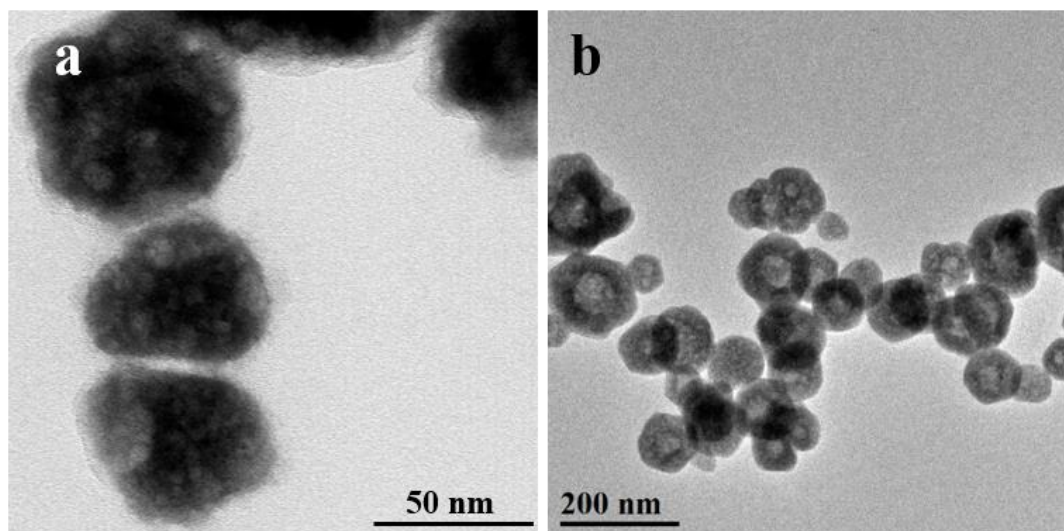

**Figure S1.** Transmission electron microscopy (TEM) images of a)  $\text{BiF}_3$  and b)  $\text{BiF}_3@PDA@HA$ .

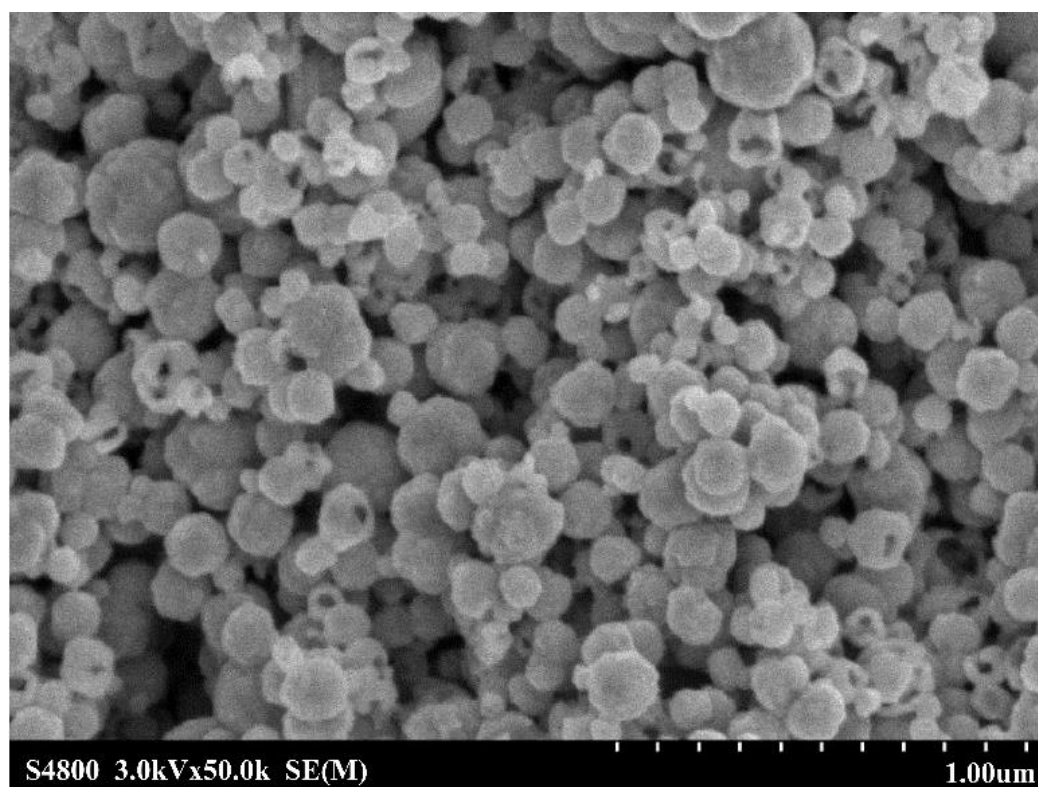

**Figure S2.** Scanning electron microscopy (SEM) images of  $\text{BiF}_3$ .

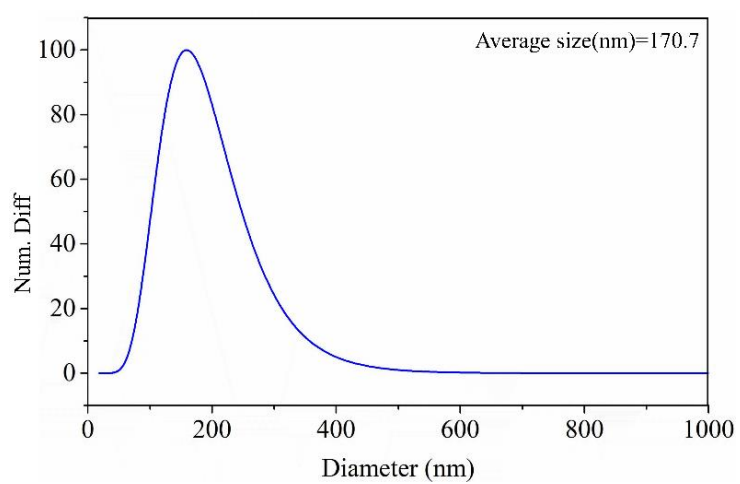

**Figure S3.** Dynamic light scattering(DLS) distribution curve of  $\text{BiF}_3@PDA@HA$ .

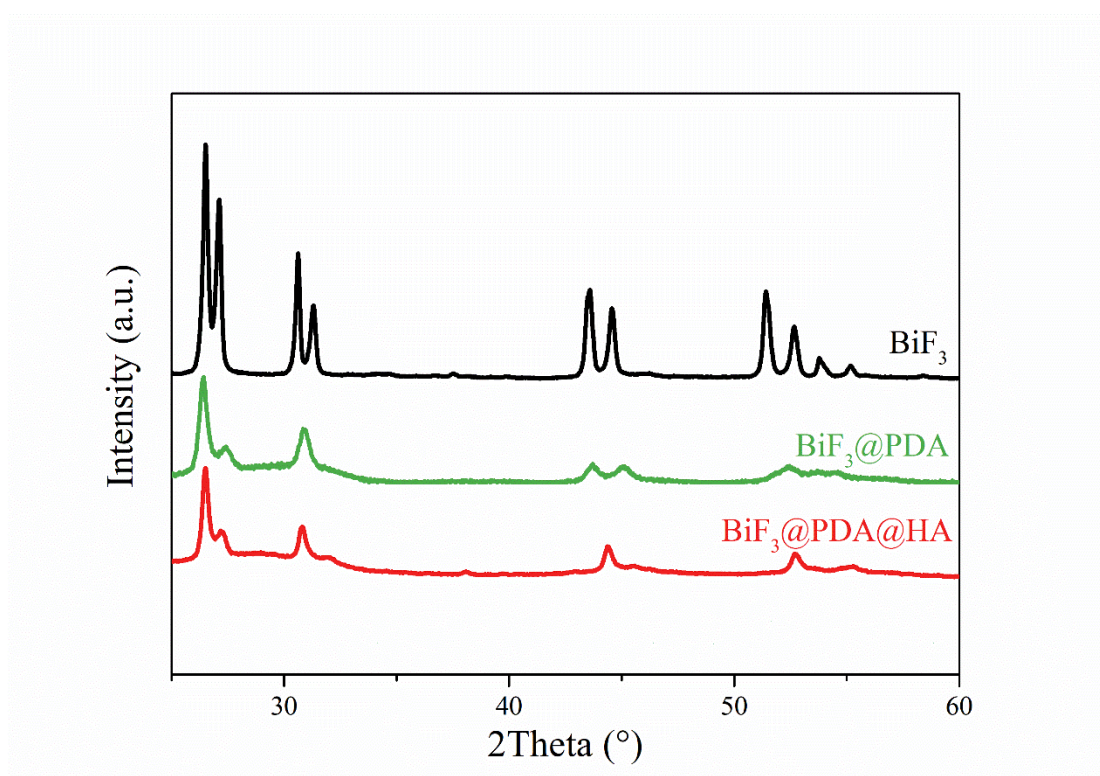

**Figure S4.** X-ray diffraction (XRD) patterns of  $\text{BiF}_3$  (JCPDS No. 70-2407),  $\text{BiF}_3@PDA$ , and  $\text{BiF}_3@PDA@HA$ .

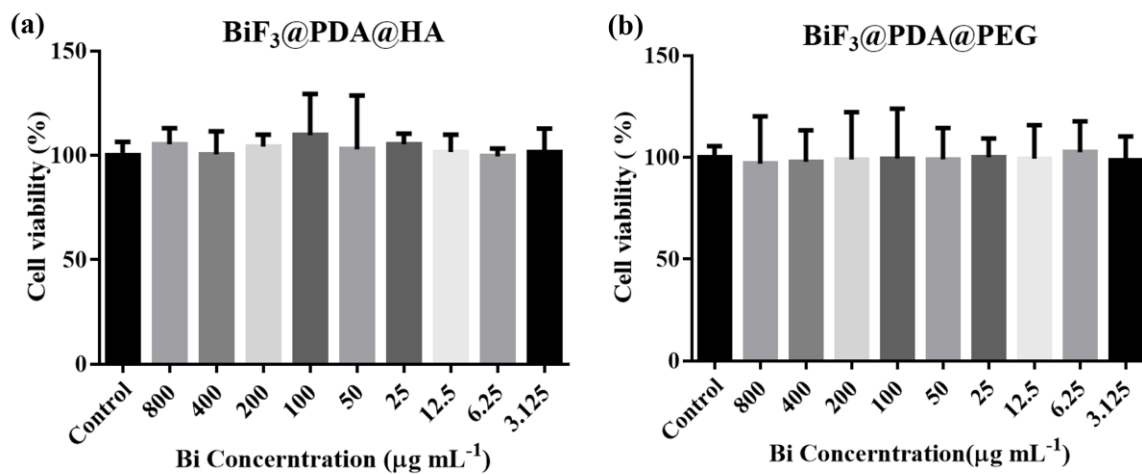

**Figure S5.** CCK8 assay of  $\text{BiF}_3@PDA@HA$  (a), and  $\text{BiF}_3@PDA@PEG$  (b) in AML cells for 24-hour co-incubation ( $n=6$ ). Data was illustrated as mean  $\pm$  standard deviation.

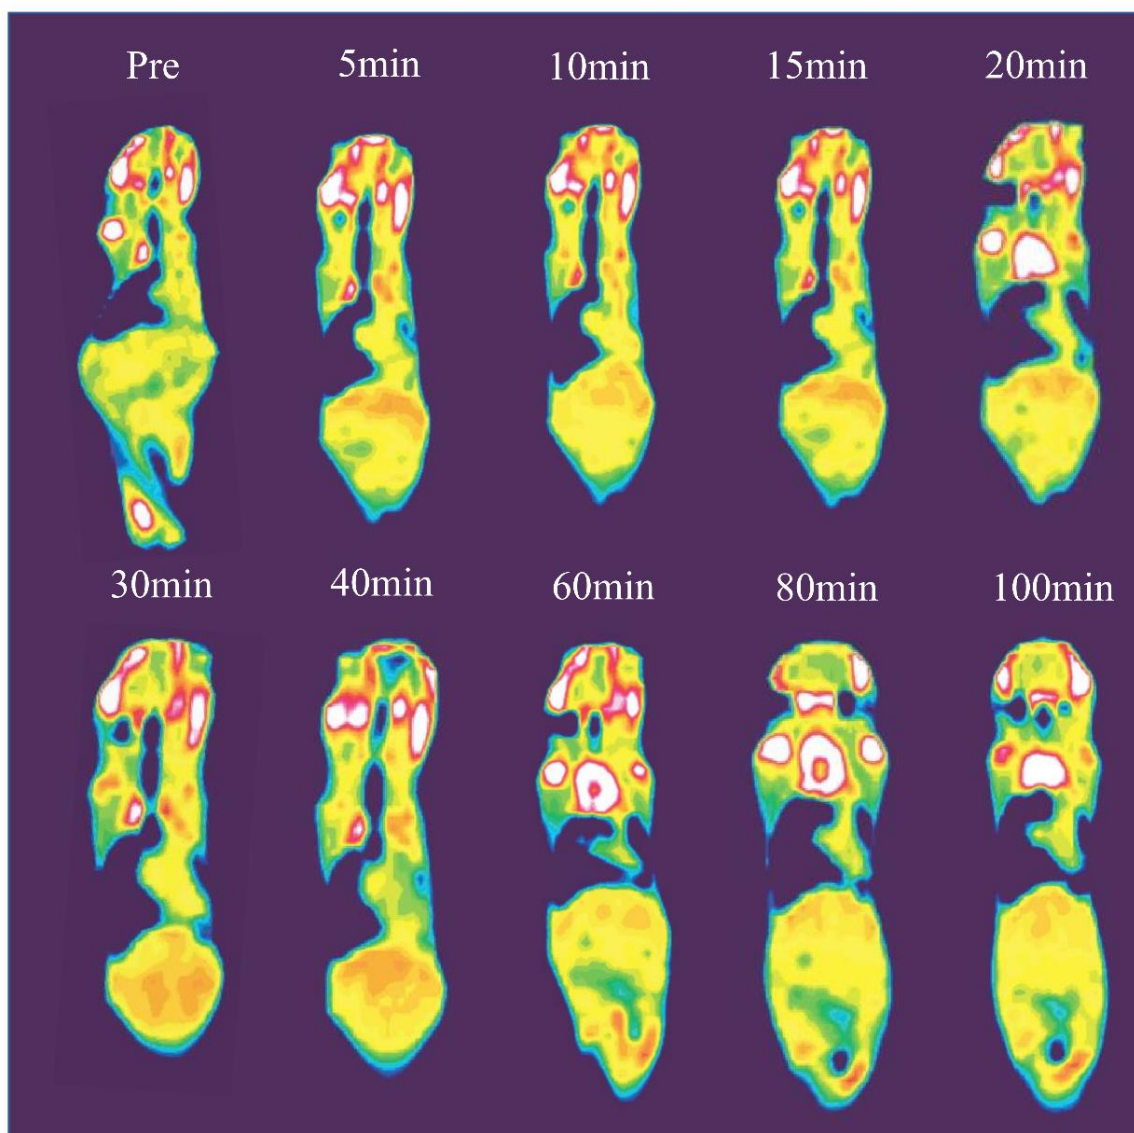

**Figure S6.** Representative computed tomography (CT) images of mice in the targeted group (liver fibrosis model mice injected with  $\text{BiF}_3\text{@PDA@HA}$ ,  $n=3$ ) before and after injection of  $\text{BiF}_3\text{@PDA@HA}$  in the coronal projection.

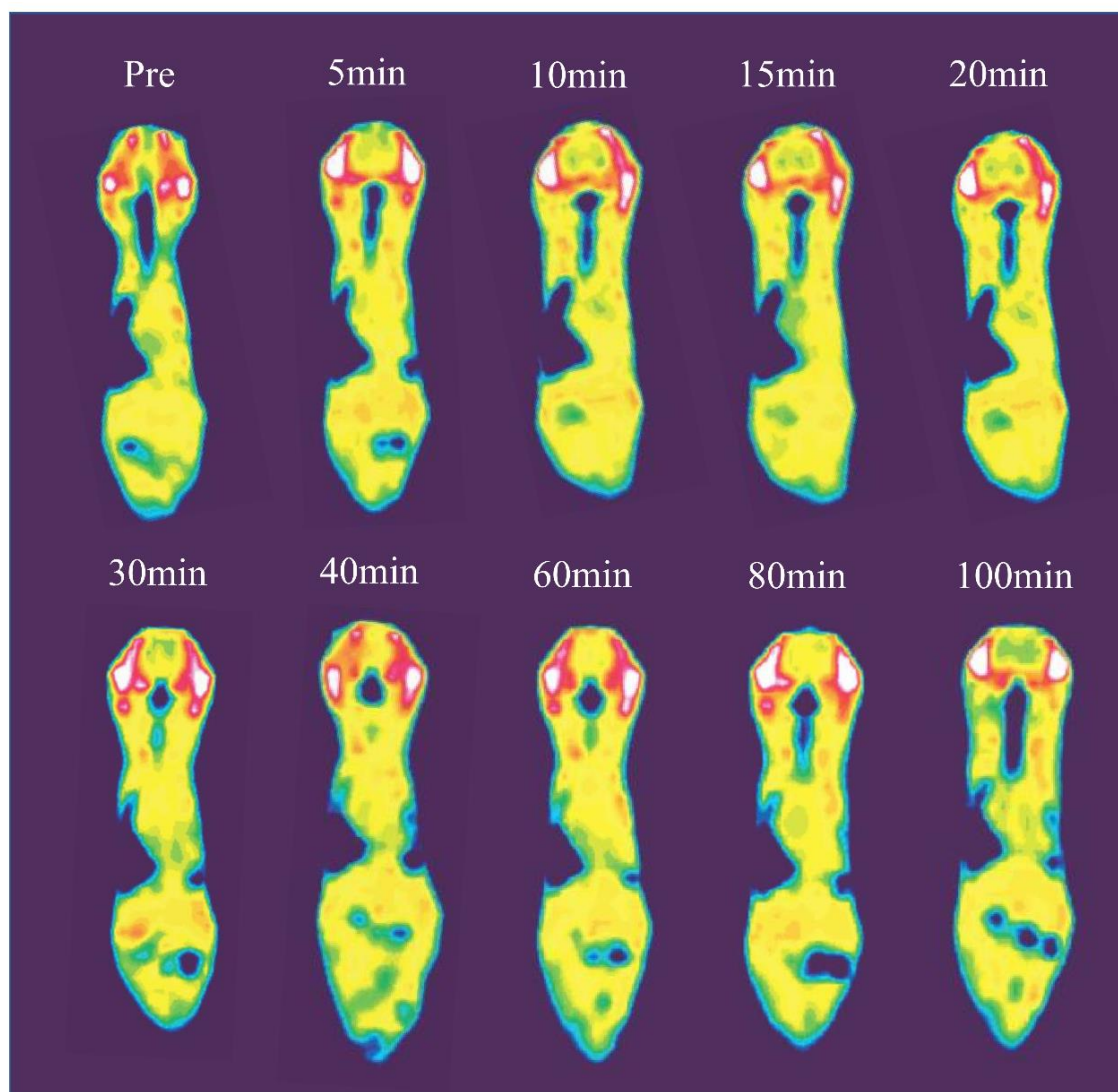

**Figure S7.** Representative spectral computed tomography (CT) images of mice in the control group(healthy mice injected with  $\text{BiF}_3\text{@PDA@HA}$ ,  $n=3$ ) before and after injection of  $\text{BiF}_3\text{@PDA@PEG}$  in the coronal projection.



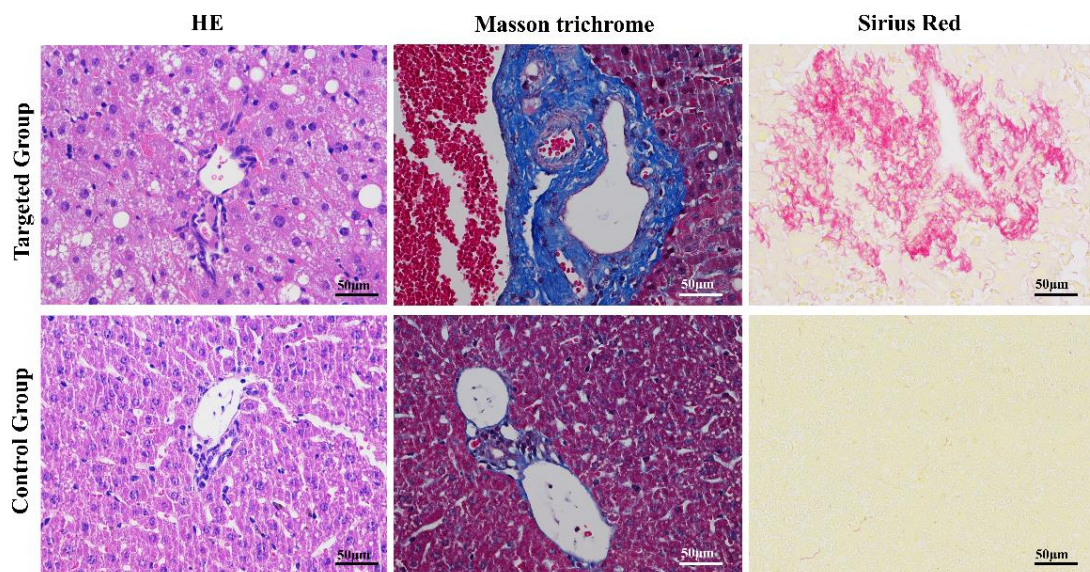

**Figure S8.** Representative histologic images (400 x) from mice models with liver fibrosis in the targeted group, as well as healthy mice in the control group.

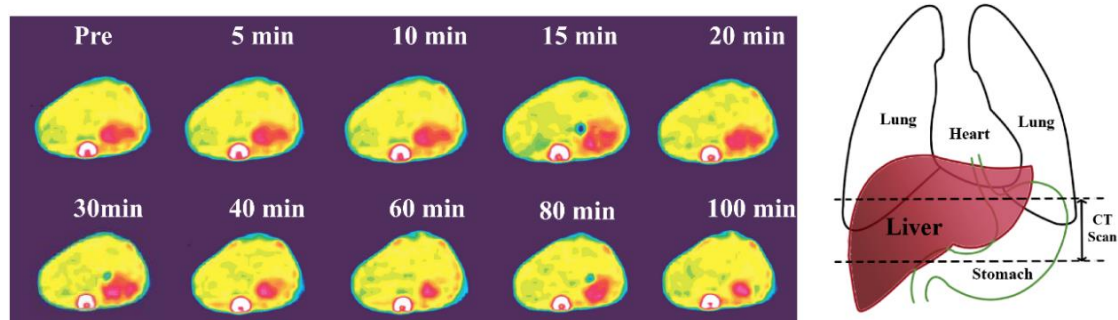

**Figure S9.** Representative spectral computed tomography(CT) images of the non-targeted group (liver fibrosis mice injected with  $\text{BiF}_3@PDA@PEG$ ,  $n=3$ ) pre- and post- injection of  $\text{BiF}_3@PDA@PEG$ . The schematic drawings illustrate the taken CT sections.

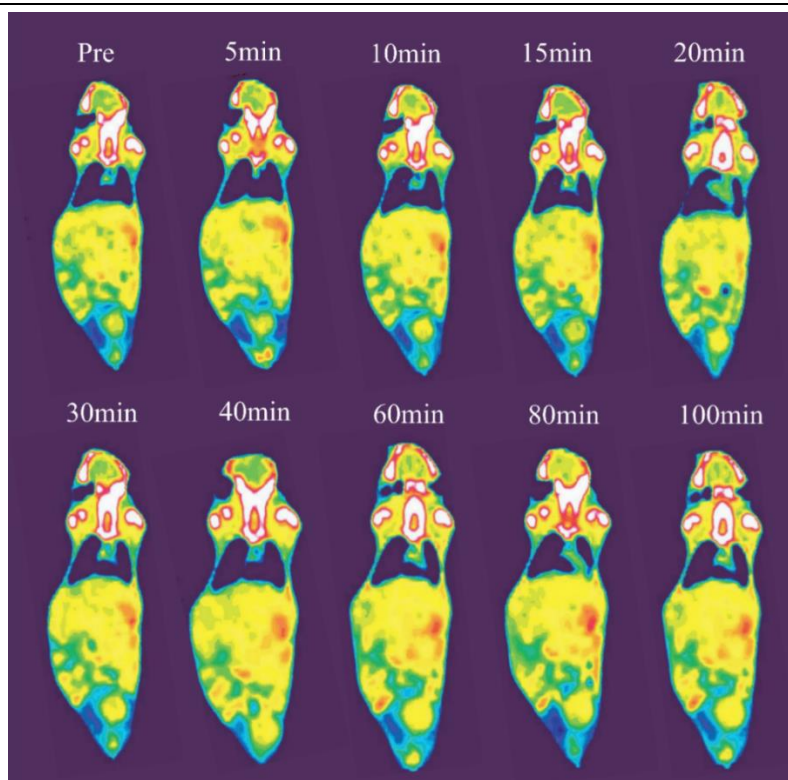

**Figure S10.** Representative spectral computed tomography(CT) images of mice in the non-targeted group (liver fibrosis mice injected with  $\text{BiF}_3@PDA@PEG$ ,  $n=3$ ) before and after injection of  $\text{BiF}_3@PDA@PEG$  in the coronal projection.

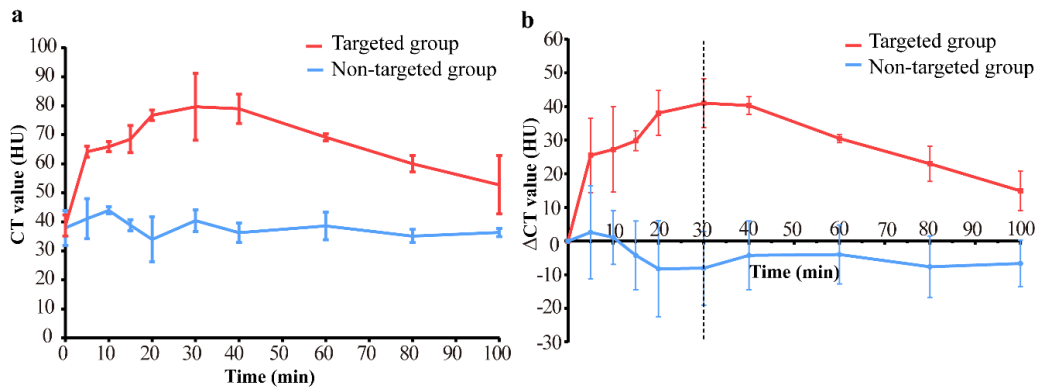

**Figure S11.** Dynamic time courses of the CT value (a) and CT value change ( $\Delta$ CT value) (b) of hepatic parenchyma in targeted group (liver fibrosis mice with  $\text{BiF}_3@PDA@HA$ ,  $n=3$ , red line) and non-targeted group (liver fibrosis model mice with  $\text{BiF}_3@PDA@PEG$ ,  $n=3$ , blue line). Data was illustrated as mean  $\pm$  standard deviation. CT: Computed tomography; HU: Hounsfield unit.

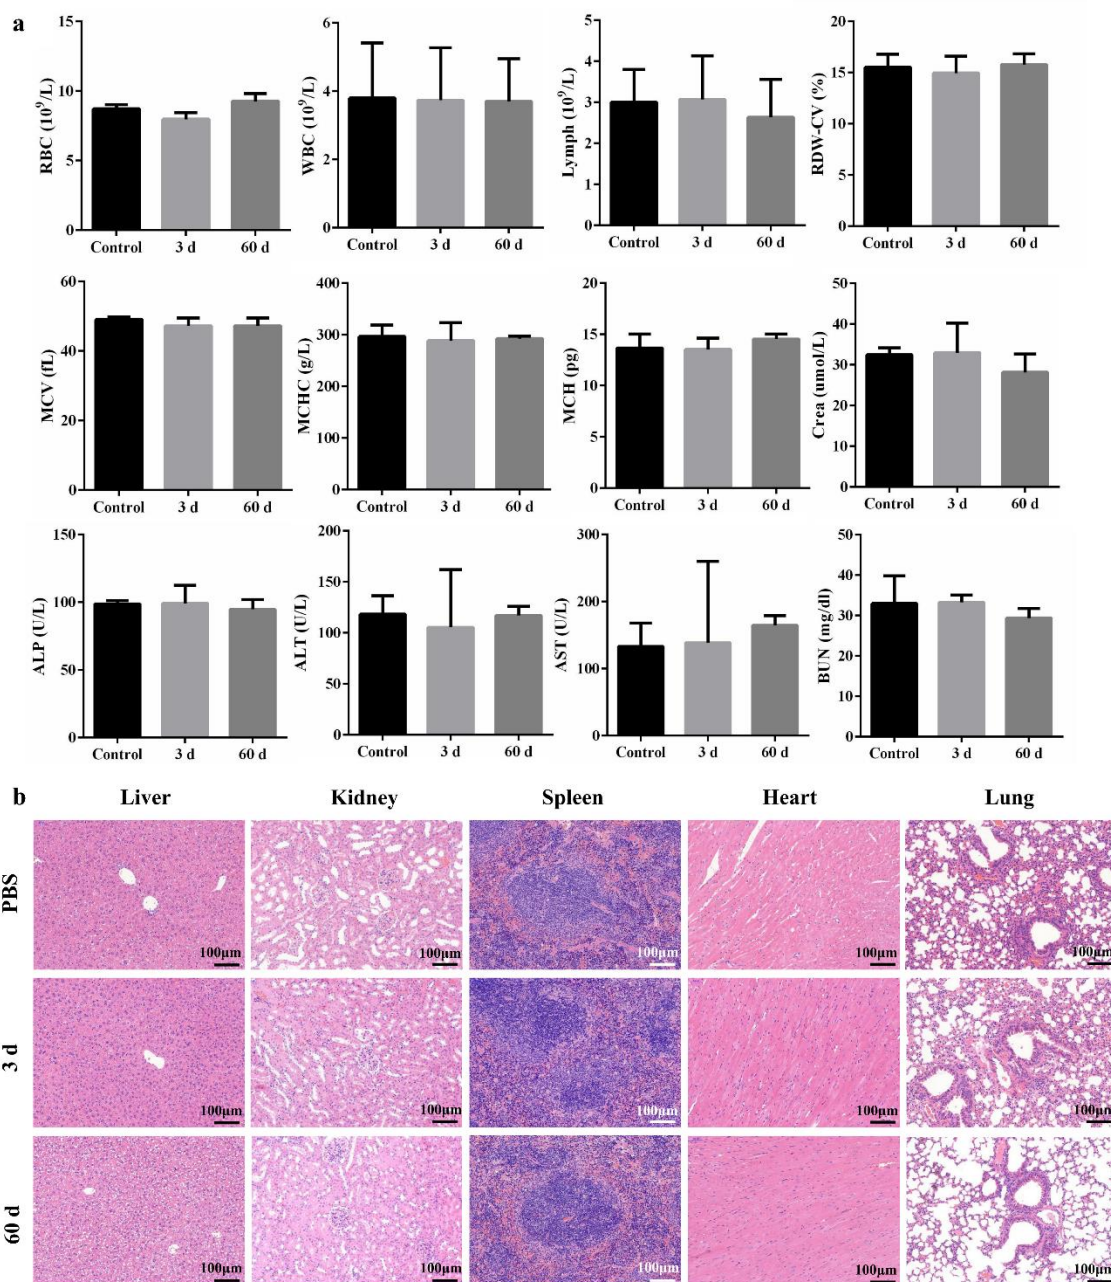

**Figure S12.** *In vivo* toxicity evaluation of BiF<sub>3</sub>@PDA@HA. a) Hematological indices and b) hematoxylin and eosin (H&E) staining of major organs of ICR mice at 3 days and 60 days post-injection of BiF<sub>3</sub>@PDA@HA (n=3). Data was illustrated as mean  $\pm$  standard deviation. Data was illustrated as mean  $\pm$  standard deviation.

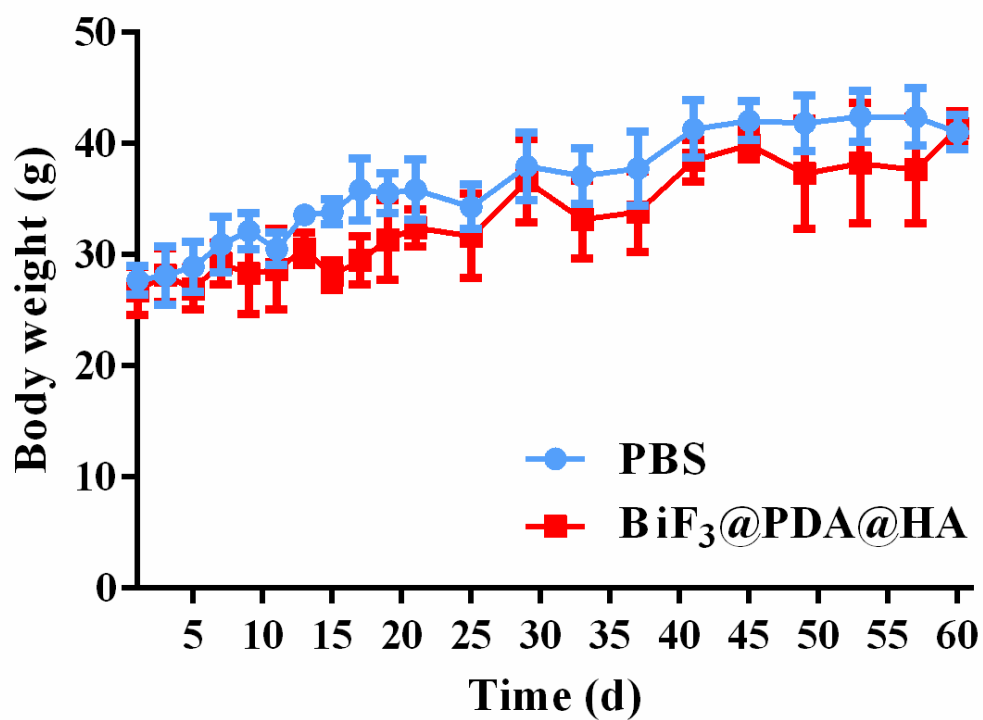

**Figure S13.** Body weight fluctuations in mice injected with BiF<sub>3</sub>@PDA@HA nanoprobes (n=3) or treated with PBS (n=3) for 60 days. Data was expressed as mean± standard deviation.
